# Supplementary material
Source: MDPI journal article supplement (https://www.mdpi.com/2227-7102/14/2/159)
Supplement: s1 [file s1 › education-2517228-supplementary.pdf]

# Cognitive Control among Primary- and Middle-School Students and Their Associations with Math Achievement

## Supplemental Materials

The supplemental materials include the following: descriptive statistics of accuracy rates and RTs for all Stroop conflict tasks (Table S1); descriptive plots for the ANOVA (Figures S1-S8); distribution and scatter plots of reported correlations (Figures S9-S20); Fisher R to Z analysis between correlations of cognitive control measures and Raven score with math achievements between Age Groups (Table S2).

**Table S1. Descriptive statistics of accuracy rates and RTs for all Stroop conflict tasks.**

**A. Descriptive Statistics Physical task in congruent and incongruent conditions: RT, Accuracy Rates**

|                | Congruent RT |        | Congruent Accuracy |        | Incongruent RT |        | Incongruent Accuracy |        |
|----------------|--------------|--------|--------------------|--------|----------------|--------|----------------------|--------|
|                | Primary      | Middle | Primary            | Middle | Primary        | Middle | Primary              | Middle |
| Mean           | 621.30       | 513.06 | 99.14              | 98.85  | 651.92         | 537.80 | 97.98                | 97.45  |
| Std. Deviation | 118.89       | 70.11  | 1.97               | 2.30   | 128.71         | 80.87  | 3.21                 | 3.38   |

**B. Descriptive Statistics Numerical task in congruent and incongruent conditions: RT, Accuracy Rates**

|                | Congruent RT |        | Congruent Accuracy |        | Incongruent RT |        | Incongruent Accuracy |        |
|----------------|--------------|--------|--------------------|--------|----------------|--------|----------------------|--------|
|                | Primary      | Middle | Primary            | Middle | Primary        | Middle | Primary              | Middle |
| Mean           | 815.81       | 694.42 | 98.54              | 98.49  | 927.67         | 781.80 | 88.26                | 89.11  |
| Std. Deviation | 162.97       | 120.02 | 2.31               | 2.19   | 184.14         | 132.56 | 10.13                | 8.13   |

**C. Descriptive Statistics Location task in congruent and incongruent conditions: RT, Accuracy Rates**

|                | Congruent RT |        | Congruent Accuracy |        | Incongruent RT |        | Incongruent Accuracy |        |
|----------------|--------------|--------|--------------------|--------|----------------|--------|----------------------|--------|
|                | Primary      | Middle | Primary            | Middle | Primary        | Middle | Primary              | Middle |
| Mean           | 591.46       | 555.72 | 96.9               | 95.9   | 624.00         | 583.24 | 93.5                 | 92.9   |
| Std. Deviation | 128.02       | 128.26 | 3.7                | 4.4    | 138.27         | 145.46 | 5.9                  | 6.6    |

**D. Descriptive Statistics Direction task in congruent and incongruent conditions: RT, Accuracy Rates**

|                | <b>Congruent<br/>RT</b> |        | <b>Congruent<br/>Accuracy</b> |        | <b>Incongruent<br/>RT</b> |        | <b>Incongruent<br/>Accuracy</b> |        |
|----------------|-------------------------|--------|-------------------------------|--------|---------------------------|--------|---------------------------------|--------|
|                | Primary                 | Middle | Primary                       | Middle | Primary                   | Middle | Primary                         | Middle |
| Mean           | 684.27                  | 615.16 | 96.4                          | 96.0   | 765.69                    | 664.61 | 88.0                            | 89.5   |
| Std. Deviation | 162.22                  | 111.23 | 4.2                           | 4.9    | 162.11                    | 102.39 | 10.2                            | 11.8   |

**Figures S1-S8: Descriptive plots for the ANOVA.**

**S1. Task**

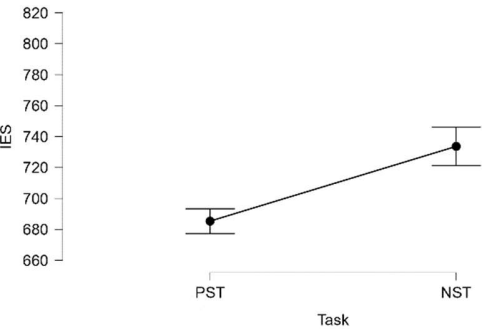

**S2. Level**

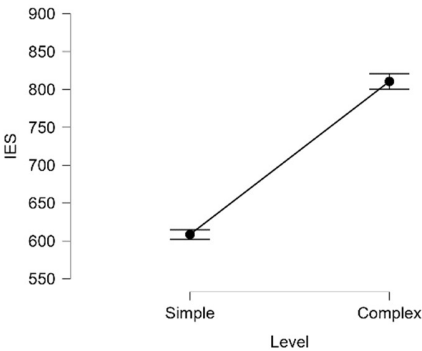

**S3. Congruity**

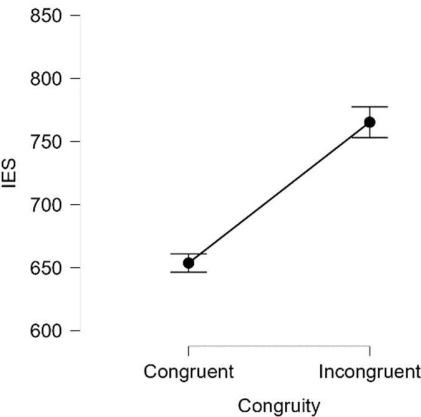

**S4. Class**

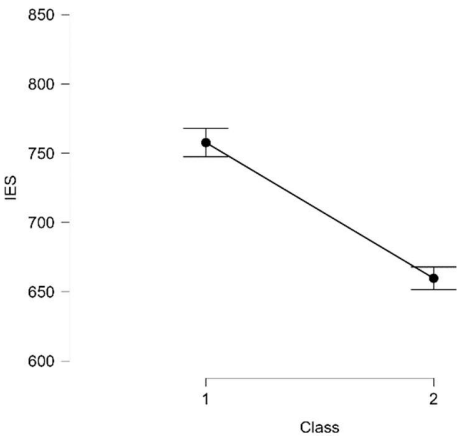

### S5. Task X Level

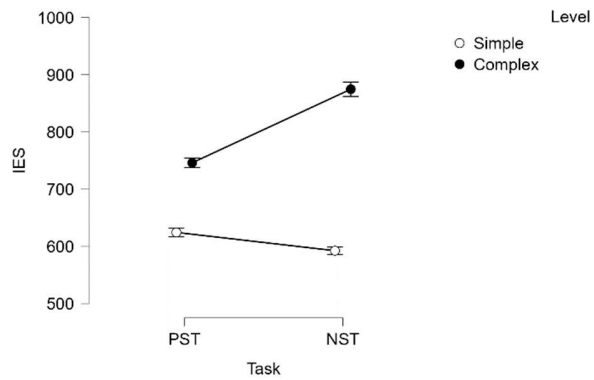

### S6. Congruity X Level

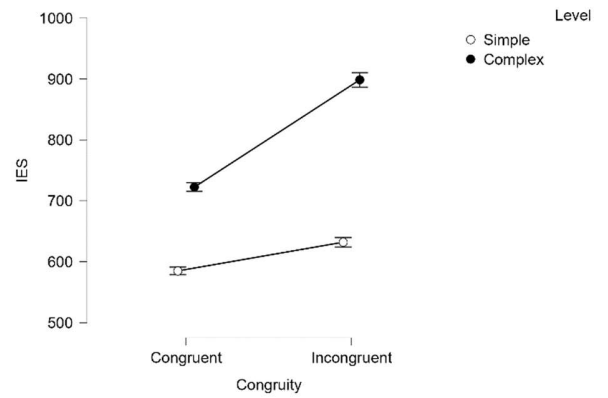

### S7. Congruity X Level X Class

Class: Primary

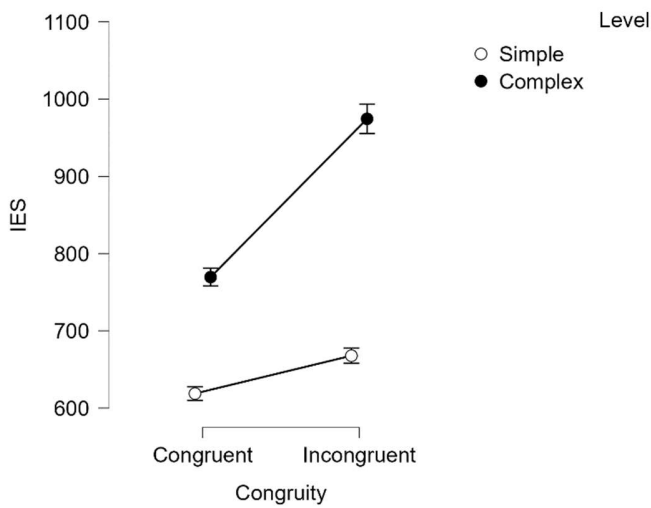

Middle

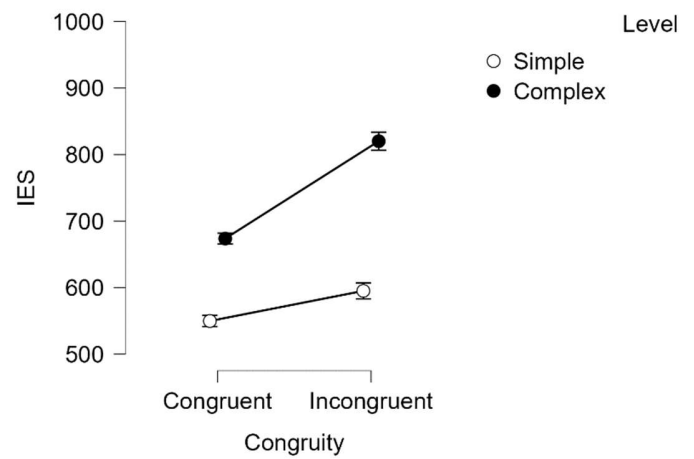

### S8. Task X Congruity X Class

Class: Primary

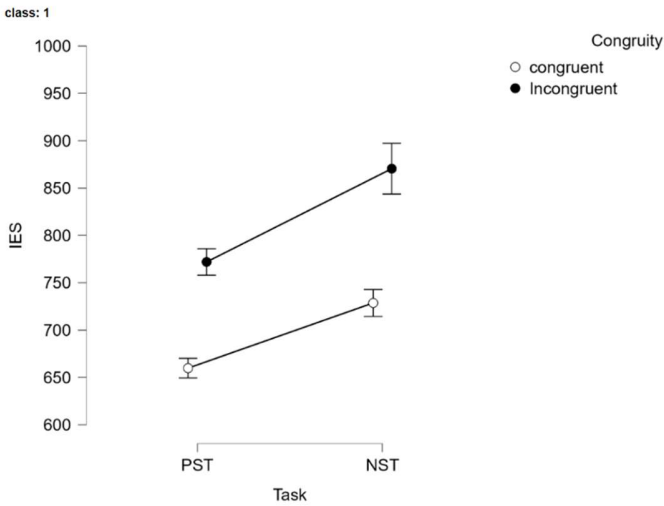

Middle

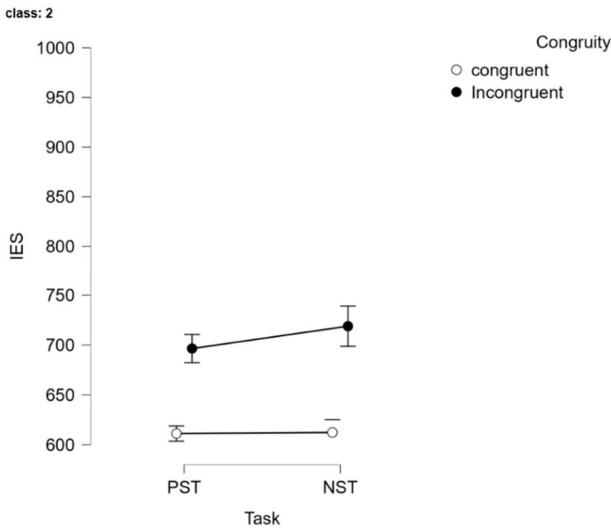

**Figures S9-20: Distribution and scatter plots of reported correlations.**

**S9. Math Fluency – Number of exercises for primary and middle school students**

**Primary**

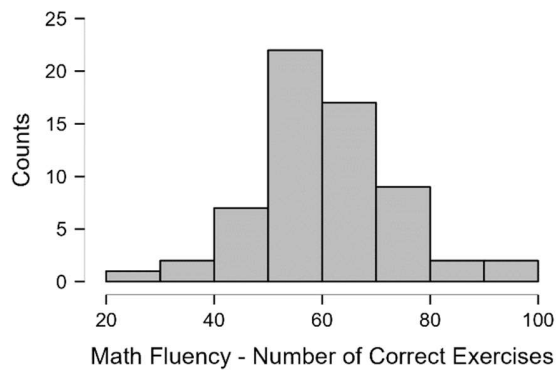

**Middle**

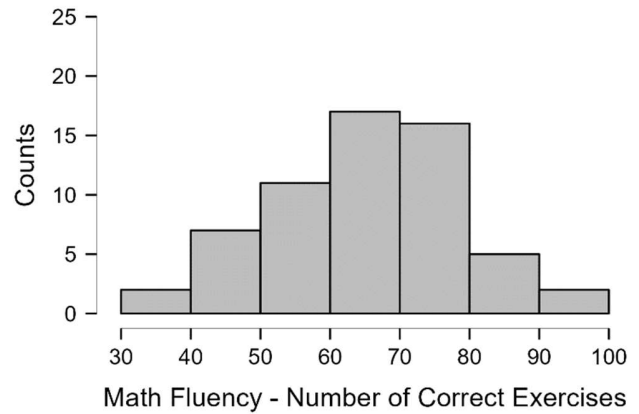

**S10. Math Fluency – Accuracy rates for primary and middle school students**

**Primary**

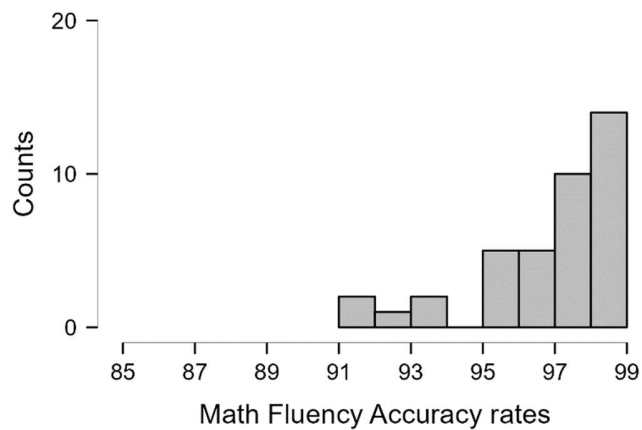

**Middle**

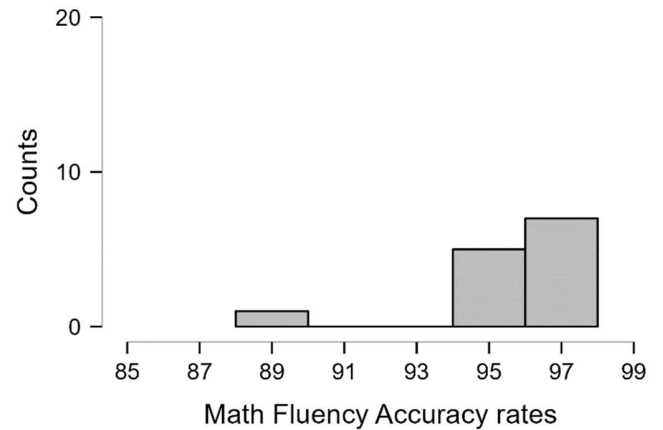

**S11. Correlation between PST Location congruency effect and Z- Curriculum Math Test**

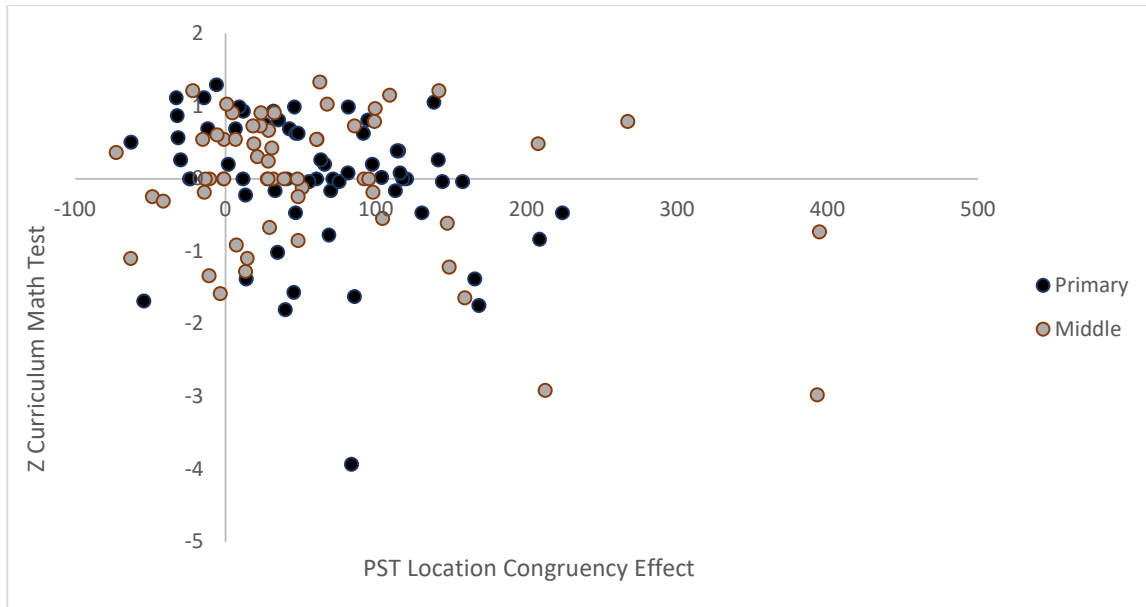

**S12. Correlation between PST Direction Congruency Effect and Z Curriculum Math Test**

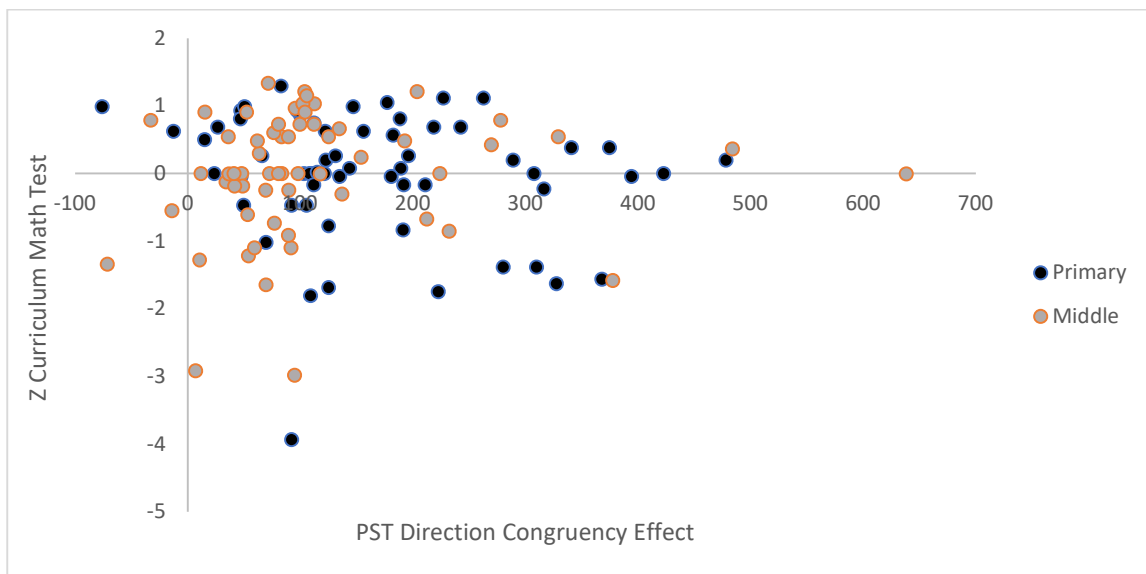

**S13. Correlation between NST Physical Congruency Effect and Z Curriculum Math Test**

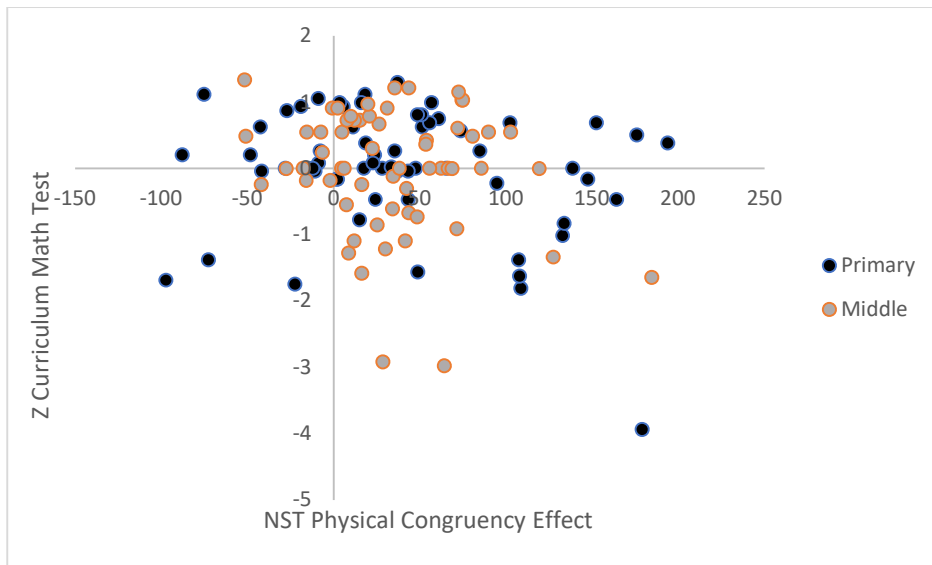

**S14. Correlation between NST Numerical Congruency Effect and Z Curriculum Math Test**

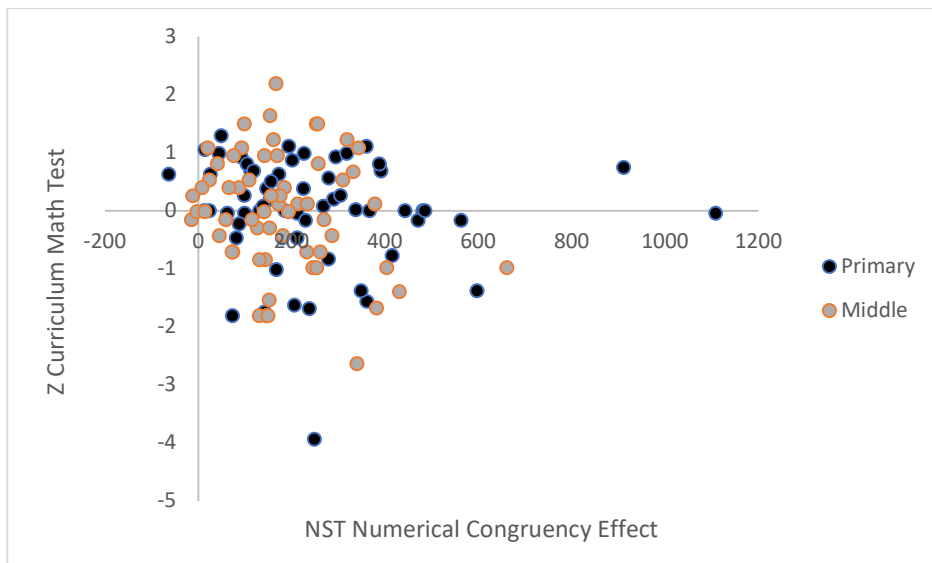

### S15. Correlation between PST Location Congruency Effect and Math fluency Test

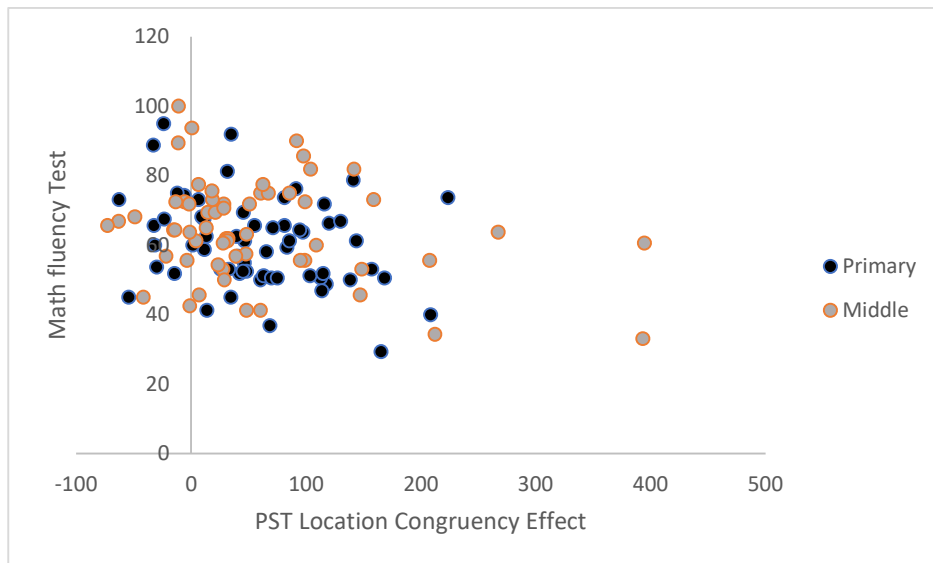

### S16. Correlation between PST Direction Congruency Effect and Math fluency Test

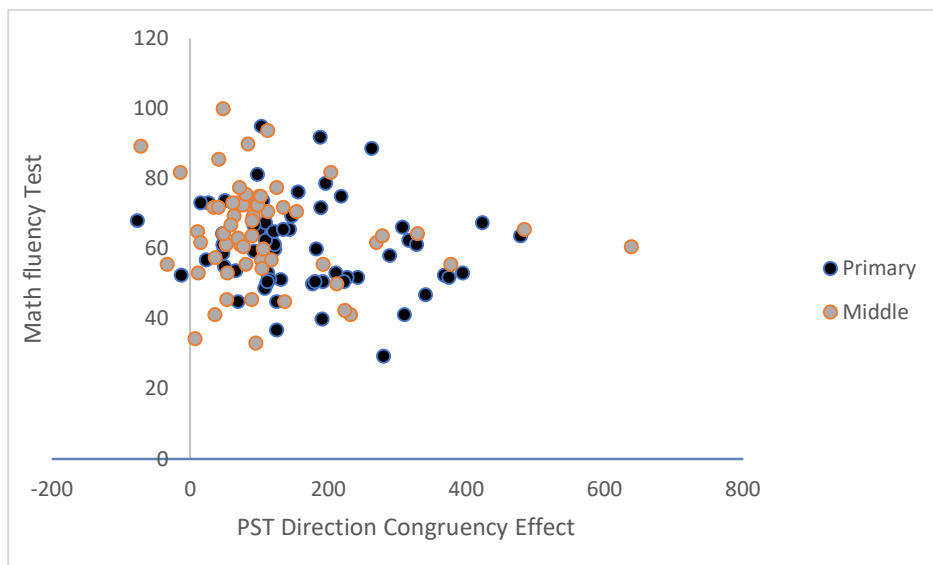

### S17. Correlation between NST Physical Congruency Effect and Math fluency Test

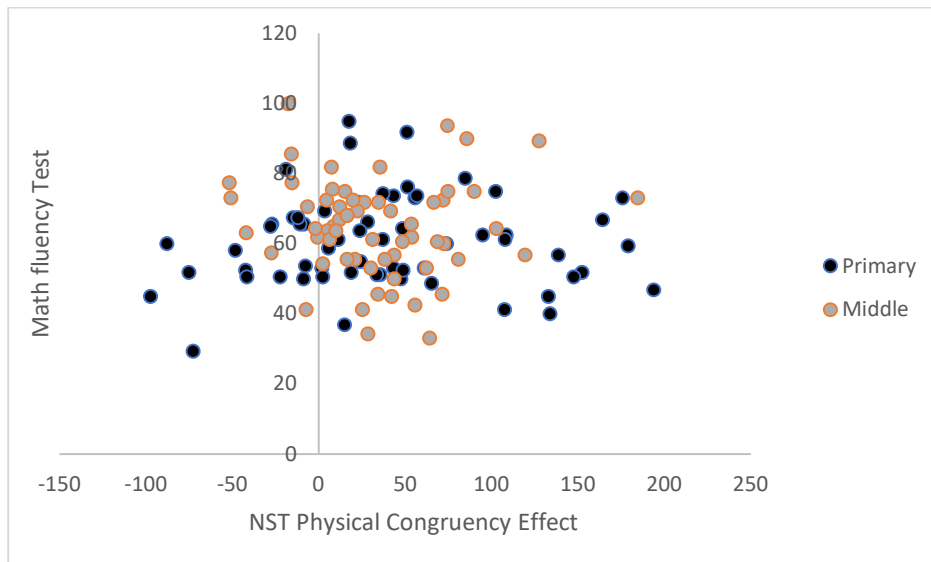

### S18. Correlation between NST Numerical Congruency Effect and Math fluency Test

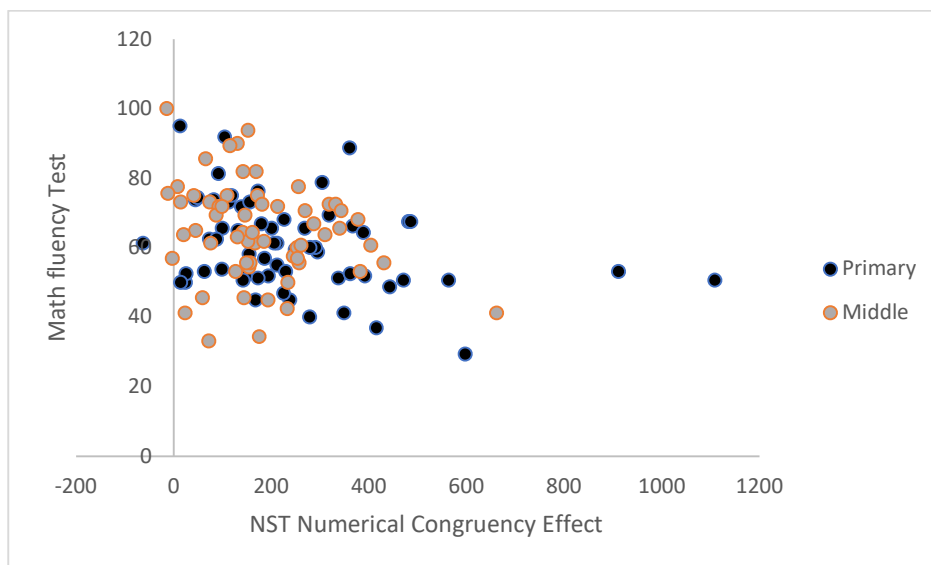

### S19. Correlation between Z Curriculum Math Test and Raven Z score

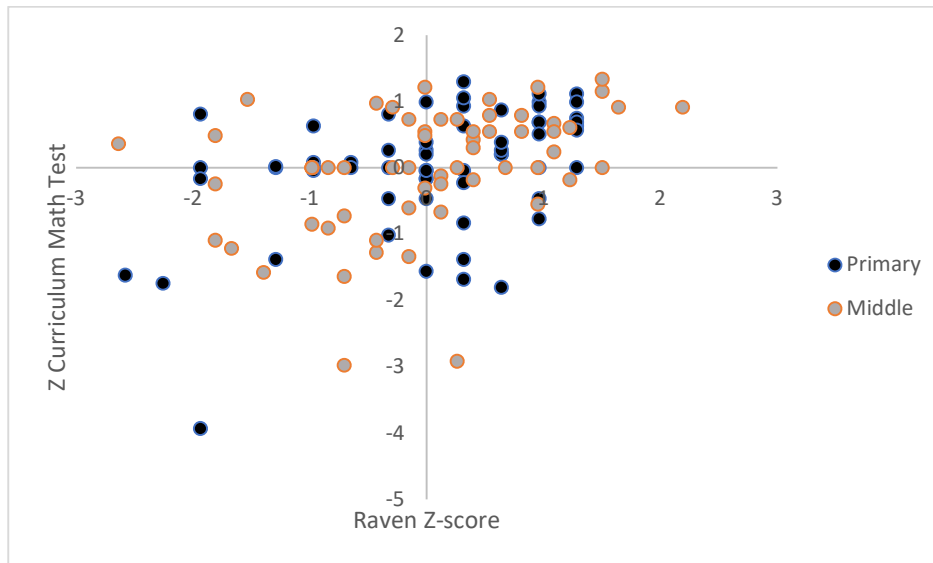

### S20. Correlation between Math fluency Test and Raven Z score

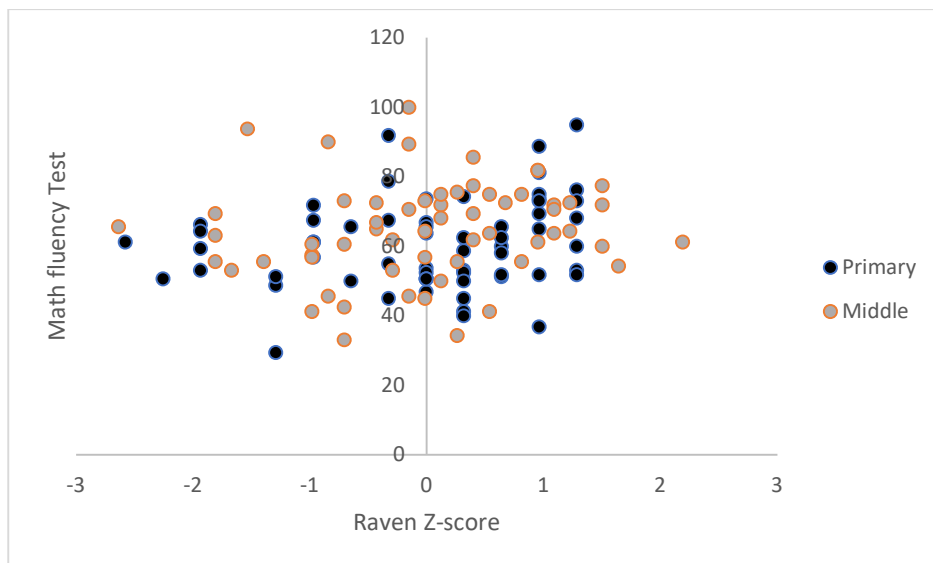

**Table S2. Fisher r to z analysis between correlations of cognitive control measures and Raven score with math achievements between Age Groups.**

*N* for primary school students is 62 and for middle school students is 60.

**A. Raven and Math fluency**

|                         | n     | r   |
|-------------------------|-------|-----|
| Correlation 1           | 62    | .22 |
| Correlation 2           | 60    | .14 |
| Test Statistic <i>z</i> | 0.445 |     |
| Probability <i>p</i>    | 0.328 |     |

**B. Raven and Math curriculum**

|                         | n     | r   |
|-------------------------|-------|-----|
| Correlation 1           | 62    | .49 |
| Correlation 2           | 60    | .40 |
| Test Statistic <i>z</i> | 0.605 |     |
| Probability <i>p</i>    | 0.273 |     |

**C. Location-congruency effect and Math fluency**

|                         | n      | r    |
|-------------------------|--------|------|
| Correlation 1           | 62     | -.27 |
| Correlation 2           | 60     | -.25 |
| Test Statistic <i>z</i> | -0.116 |      |
| Probability <i>p</i>    | 0.454  |      |

D. Location-congruency effect and Math curriculum

|                    | n     | r    |
|--------------------|-------|------|
| Correlation 1      | 62    | -.27 |
| Correlation 2      | 60    | -.31 |
| Test Statistic $z$ | 0.235 |      |
| Probability $p$    | 0.407 |      |

E. Direction-congruency effect and Math fluency

|                    | n     | r    |
|--------------------|-------|------|
| Correlation 1      | 62    | -.16 |
| Correlation 2      | 60    | -.14 |
| Test Statistic $z$ | -0.11 |      |
| Probability $p$    | 0.456 |      |

F. Direction-congruency effect and Math curriculum

|                    | n      | r    |
|--------------------|--------|------|
| Correlation 1      | 62     | -.18 |
| Correlation 2      | 60     | .11  |
| Test Statistic $z$ | -1.575 |      |
| Probability $p$    | 0.058  |      |

**G. Physical-congruency effect and Math fluency**

|                    | n     | r    |
|--------------------|-------|------|
| Correlation 1      | 62    | .03  |
| Correlation 2      | 60    | -.03 |
| Test Statistic $z$ | 0.323 |      |
| Probability $p$    | 0.373 |      |

**H. Physical-congruency effect and Math curriculum**

|                    | n      | r    |
|--------------------|--------|------|
| Correlation 1      | 62     | -.22 |
| Correlation 2      | 60     | -.21 |
| Test Statistic $z$ | -0.056 |      |
| Probability $p$    | 0.477  |      |

**I. Numerical-congruency effect and Math fluency**

|                    | n      | r    |
|--------------------|--------|------|
| Correlation 1      | 62     | -.33 |
| Correlation 2      | 60     | -.25 |
| Test Statistic $z$ | -0.471 |      |
| Probability $p$    | 0.319  |      |
